# Supplementary material for: Unusual biogenic calcite structures in two shallow lakes, James Ross Island, Antarctica
Source: Copernicus journal article supplement (doi:10.5194/bg-13-535-2016), 2016-01-28

Supplement of Biogeosciences, 13, 535–549, 2016  
<http://www.biogeosciences.net/13/535/2016/>  
doi:10.5194/bg-13-535-2016-supplement  
© Author(s) 2016. CC Attribution 3.0 License.

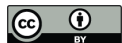

Biogeosciences  Open Access

*Supplement of*

## **Unusual biogenic calcite structures in two shallow lakes, James Ross Island, Antarctica**

**J. Elster et al.**

*Correspondence to:* J. Elster (jelster@prf.jcu.cz)

The copyright of individual parts of the supplement might differ from the CC-BY 3.0 licence.

1 **Supplement**

2 Figure S1. Relative frequency of hourly values of water temperature in lake 1 (a) and air  
3 temperature in the Solorina Valley (b) from February 2009 to November 2010.

4

5 Figure S2. Occurrence of days with lake 1 water temperature (L1 water) higher than  $-4\text{ }^{\circ}\text{C}$   
6 complemented with monthly mean global solar radiation at Mendel Station both from  
7 February 2009 to November 2010.

8

9

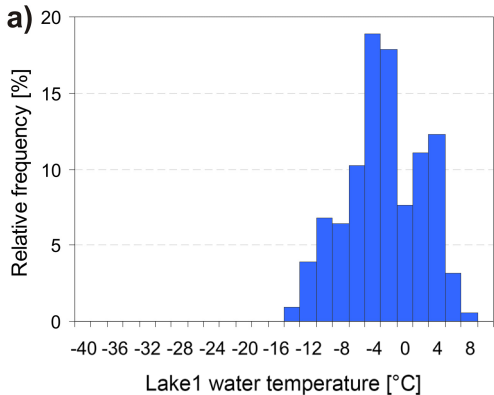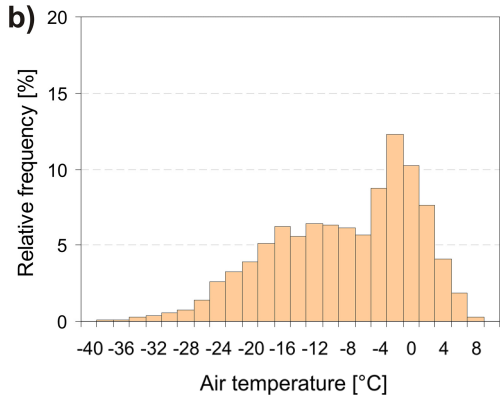

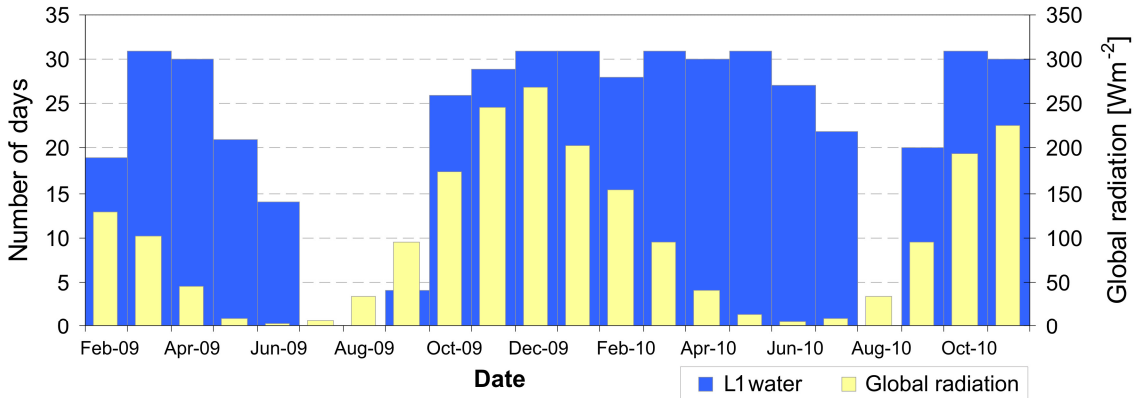

Supplement: Supplementary file 1 [file bg-13-535-2016-supplement.pdf]
